# Supplementary material for: Selectively enhanced sensing performance for oxidizing gases based on ZnO nanoparticle-loaded electrospun SnO2 nanotube heterostructures
Source: Royal Society of Chemistry journal article supplement (doi:10.1039/c6ra03061k), 2016-01-01
Supplement: c6ra03061k1.pdf [file c6ra03061k1.pdf]

## Supporting Information

### Selectively Enhanced Sensing Performance for Oxidizing Gases Based on ZnO Nanoparticle-loaded Electrospun SnO<sub>2</sub> Nanotube Heterostructures

Kaidi Diao,<sup>†,‡,¶</sup> Yunpeng Huang,<sup>§,¶</sup> Minjie Zhou,<sup>‡</sup> Jicheng Zhang,<sup>‡</sup> Yongjian Tang,<sup>‡</sup>  
Shuxia Wang,<sup>†</sup> Tianxi Liu,<sup>§</sup> and Xudong Cui<sup>\*‡</sup>

<sup>†</sup>*Department of Applied Physics, Chongqing University, Chongqing, 400044, China*

<sup>‡</sup>*Science and Technology on Plasma Physics Laboratory, Research Center of Laser Fusion, CAEP, Mianyang, 621900, China*

<sup>§</sup>*State Key Laboratory of Molecular Engineering of Polymers, Department of Macromolecular Science, Fudan University, Shanghai, 200433, China*

<sup>¶</sup>K. D and Y. H contribute equally to this work.

\*To whom correspondence should be addressed. E-mail: xudcui@gmail.com

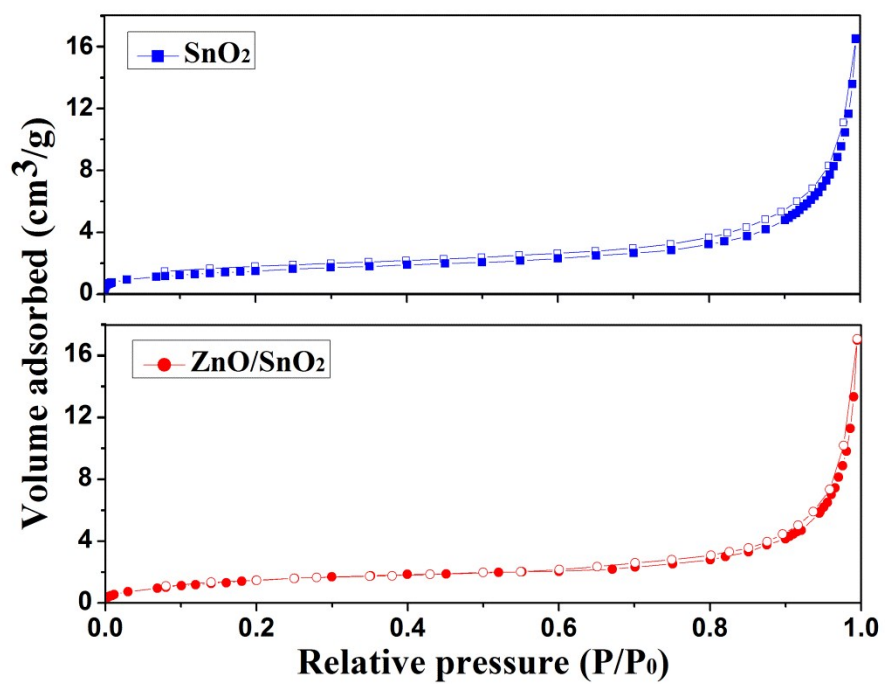

Figure S1. Nitrogen adsorption-desorption isotherms of (a) the electrospun SnO<sub>2</sub> NTs and (b) the ZnO/SnO<sub>2</sub> HSs.
